# Supplementary material for: Evaluation of epidermal growth factor receptor signaling effects in gastric cancer cell lines by detailed motility-focused phenotypic characterization linked with molecular analysis
Source: Springer Nature journal article supplement (doi:10.1186/s12885-017-3822-3), 2017-12-01
Supplement: MOESM1 [file 15304870]

**Table S1**

Analysis of the 2D motility parameters “percentage of motile cells” and “average speed” for AGS, Hs746T, LMSU and MKN1 cells. The numbers of analyzed films (n), the mean and the standard deviation (SD) of the percentage of motile cells (motility) and the average speed are shown

| <b>AGS</b>          | <b>Untreated</b> | <b>EGF<br/>[5 ng/ml]</b> | <b>EGF +<br/>Cetuximab<br/>[1 µg/ml]</b>    | <b>EGF +<br/>Cetuximab<br/>[50 µg/ml]</b>  | <b>Cetuximab<br/>[1 µg/ml]</b>           |                                |
|---------------------|------------------|--------------------------|---------------------------------------------|--------------------------------------------|------------------------------------------|--------------------------------|
| <b>n</b>            | 5                | 4                        | 4                                           | 5                                          | 3                                        |                                |
| <b>Motility [%]</b> |                  |                          |                                             |                                            |                                          |                                |
| Mean                | 96.26            | 99.43                    | 96.87                                       | 96.78                                      | 96.44                                    |                                |
| SD                  | 3.82             | 1.14                     | 3.19                                        | 3.81                                       | 1.94                                     |                                |
| <b>Speed [µm/h]</b> |                  |                          |                                             |                                            |                                          |                                |
| Mean                | 45.00            | 61.33                    | 48.91                                       | 48.94                                      | 41.02                                    |                                |
| SD                  | 9.82             | 7.03                     | 4.00                                        | 12.42                                      | 7.76                                     |                                |
| <b>Hs746T</b>       | <b>Untreated</b> | <b>EGF<br/>[5 ng/ml]</b> | <b>EGF +<br/>Cetuximab<br/>[1 µg/ml]</b>    | <b>EGF +<br/>Cetuximab<br/>[50 µg/ml]</b>  | <b>Cetuximab<br/>[1 µg/ml]</b>           |                                |
| <b>n</b>            | 8                | 8                        | 8                                           | 7                                          | 5                                        |                                |
| <b>Motility [%]</b> |                  |                          |                                             |                                            |                                          |                                |
| Mean                | 86.84            | 84.16                    | 83.19                                       | 86.25                                      | 79.64                                    |                                |
| SD                  | 8.85             | 11.02                    | 8.56                                        | 9.71                                       | 12.57                                    |                                |
| <b>Speed [µm/h]</b> |                  |                          |                                             |                                            |                                          |                                |
| Mean                | 39.73            | 38.69                    | 36.90                                       | 41.96                                      | 43.19                                    |                                |
| SD                  | 8.30             | 11.06                    | 7.54                                        | 7.05                                       | 5.63                                     |                                |
| <b>LMSU</b>         | <b>Untreated</b> | <b>EGF<br/>[5 ng/ml]</b> | <b>EGF +<br/>Cetuximab<br/>[1 µg/ml]</b>    | <b>EGF +<br/>Cetuximab<br/>[50 µg/ml]</b>  | <b>Cetuximab<br/>[1 µg/ml]</b>           |                                |
| <b>n</b>            | 3                | 3                        | 3                                           | 3                                          | 3                                        |                                |
| <b>Motility [%]</b> |                  |                          |                                             |                                            |                                          |                                |
| Mean                | 68.29            | 79.52                    | 63.55                                       | 69.49                                      | 67.88                                    |                                |
| SD                  | 2.40             | 5.98                     | 36.28                                       | 16.22                                      | 10.56                                    |                                |
| <b>Speed [µm/h]</b> |                  |                          |                                             |                                            |                                          |                                |
| Mean                | 35.44            | 38.99                    | 36.36                                       | 40.48                                      | 37.97                                    |                                |
| SD                  | 4.34             | 3.96                     | 7.34                                        | 7.16                                       | 0.75                                     |                                |
| <b>MKN1</b>         | <b>Untreated</b> | <b>EGF<br/>[5 ng/ml]</b> | <b>EGF +<br/>Cetuximab<br/>[0.05 µg/ml]</b> | <b>EGF +<br/>Cetuximab<br/>[0.1 µg/ml]</b> | <b>EGF +<br/>Cetuximab<br/>[1 µg/ml]</b> | <b>Cetuximab<br/>[1 µg/ml]</b> |
| <b>n</b>            | 5                | 7                        | 6                                           | 6                                          | 6                                        | 5                              |
| <b>Motility [%]</b> |                  |                          |                                             |                                            |                                          |                                |
| Mean                | 49.81            | 54.25                    | 43.71                                       | 43.06                                      | 38.23                                    | 32.48                          |
| SD                  | 5.04             | 8.70                     | 8.52                                        | 8.19                                       | 10.13                                    | 15.46                          |
| <b>Speed [µm/h]</b> |                  |                          |                                             |                                            |                                          |                                |
| Mean                | 13.88            | 17.21                    | 15.61                                       | 15.60                                      | 14.43                                    | 13.98                          |
| SD                  | 1.62             | 3.10                     | 1.76                                        | 3.14                                       | 3.61                                     | 3.06                           |

**Table S2**

Pairwise comparisons of the parameter “percentage of motile cells” between different treatment conditions for AGS, Hs746T, LMSU and MKN1 cells. Cells were treated with EGF and/or cetuximab. Welch t-test was used. Significant p-values are shown.

Abbreviations: EGF 5: 5 ng/ml EGF; Cet 0.1: 0.1 µg/ml cetuximab; Cet 1: 1 µg/ml cetuximab; Cet 50: 50 µg/ml cetuximab

| Cell line | Groups (X vs. Y) |                    | Mean ± SD (X) | Mean ± SD (Y) | p-value |
|-----------|------------------|--------------------|---------------|---------------|---------|
|           | X                | Y                  |               |               |         |
| MKN1      | -                | EGF 5 +<br>Cet 1   | 49.81 ± 5.04  | 38.23 ± 10.13 | 0.041   |
|           | EGF 5            | EGF 5 +<br>Cet 0.1 | 54.25 ± 8.70  | 43.06 ± 8.19  | 0.036   |
|           | EGF 5            | EGF 5 +<br>Cet 1   | 54.25 ± 8.70  | 38.23 ± 10.13 | 0.013   |
|           | EGF 5            | Cet 1              | 54.25 ± 8.70  | 32.48 ± 15.46 | 0.030   |

**Table S3**

Pairwise comparisons of the parameter “average speed” between different treatment conditions for AGS, Hs746T, LMSU and MKN1 cells. Cells were treated with EGF and/or cetuximab. Welch t-test was used. Significant p-values are shown.

Abbreviations: EGF 5: 5 ng/ml EGF; Cet 1: 1 µg/ml cetuximab

| Cell line | Groups (X vs. Y) |                  | Mean ± SD (X) | Mean ± SD (Y) | p-value |
|-----------|------------------|------------------|---------------|---------------|---------|
|           | X                | Y                |               |               |         |
| AGS       | -                | EGF 5            | 45.00 ± 9.82  | 61.33 ± 7.03  | 0.023   |
|           | EGF 5            | EGF 5 +<br>Cet 1 | 61.33 ± 7.03  | 48.91 ± 4.00  | 0.030   |
|           | EGF 5            | Cet 1            | 61.33 ± 7.03  | 41.02 ± 7.76  | 0.022   |
| MKN1      | -                | EGF 5            | 13.88 ± 1.62  | 17.21 ± 3.10  | 0.038   |

**Table S4**

Pairwise comparisons of the invasion potential between different treatment conditions for AGS, Hs746T, LMSU and MKN1 cells. Cells were treated with EGF and/or cetuximab. Two-sided Welch t-test and one-sample t-test were used. Significant p-values are shown.

Abbreviations: EGF 5: 5 ng/ml EGF; Cet 0.1: 0.1 µg/ml cetuximab; Cet 1: 1 µg/ml cetuximab; Cet 50: 50 µg/ml cetuximab

| Cell line   | Groups (X vs. Y)   |                    | Mean ± SD (X)     | Mean ± SD (Y)     | p-value |
|-------------|--------------------|--------------------|-------------------|-------------------|---------|
|             | X                  | Y                  |                   |                   |         |
| <b>AGS</b>  | -                  | Cet 1              | 100.000           | 141.939 ± 13.258  | 0.032   |
|             | EGF 5              | Cet 1              | 89.362 ± 15.654   | 141.939 ± 13.258  | 0.012   |
| <b>MKN1</b> | -                  | EGF 5              | 100.000           | 522.327 ± 177.368 | 0.006   |
|             | -                  | EGF 5 +<br>Cet 0.1 | 100.000           | 349.438 ± 188.038 | 0.041   |
|             | EGF 5              | EGF 5 +<br>Cet 1   | 522.327 ± 177.368 | 159.823 ± 81.449  | 0.007   |
|             | EGF 5              | Cet 1              | 522.327 ± 177.368 | 88.069 ± 19.558   | 0.005   |
|             | EGF 5 +<br>Cet 0.1 | Cet 1              | 349.438 ± 188.038 | 88.069 ± 19.558   | 0.035   |

**Table S5**

Pairwise comparisons of the EGFR, MAPK and AKT activation between different treatments in MKN1 cells. Cells were treated with EGF and/or cetuximab. Welch t-test was used. Significant p-values of relevant comparisons are shown.

Abbreviations: EGF 5: 5 ng/ml EGF; Cet 0.05: 0.05 µg/ml cetuximab; Cet 0.1: 0.1 µg/ml cetuximab; Cet 1: 1 µg/ml cetuximab; Cet 10: 10 µg/ml cetuximab

| Activation of protein |                     | Groups (X vs. Y)    |                   | Mean ± SD (X) | Mean ± SD (Y)     | p-value       |               |       |
|-----------------------|---------------------|---------------------|-------------------|---------------|-------------------|---------------|---------------|-------|
|                       |                     | X                   | Y                 |               |                   |               |               |       |
| EGFR                  | 1 min               | EGF 5 +<br>Cet 0.05 | EGF 5 +<br>Cet 10 | 1.991 ± 0.196 | 0.669 ± 0.326     | 0.007         |               |       |
|                       |                     |                     | Cet 0.05          | 1.991 ± 0.196 | 0.263 ± 0.056     | 0.002         |               |       |
|                       |                     | EGF 5 +<br>Cet 0.1  | EGF 5 +<br>Cet 10 | 2.219 ± 0.345 | 0.669 ± 0.326     | 0.005         |               |       |
|                       |                     |                     | Cet 0.1           | 2.219 ± 0.345 | 0.236 ± 0.053     | 0.009         |               |       |
|                       | 3 min               | EGF 5               | EGF 5 +<br>Cet 1  | 2.478 ± 0.449 | 1.056 ± 0.317     | 0.014         |               |       |
|                       |                     |                     | EGF 5 +<br>Cet 10 | 2.478 ± 0.449 | 0.472 ± 0.126     | 0.012         |               |       |
|                       |                     |                     | Cet 10            | 2.478 ± 0.449 | 0.118 ± 0.066     | 0.011         |               |       |
|                       |                     | EGF 5 +<br>Cet 0.05 | EGF 5 +<br>Cet 1  | 3.137 ± 0.763 | 1.056 ± 0.317     | 0.028         |               |       |
|                       |                     |                     | EGF 5 +<br>Cet 10 | 3.137 ± 0.763 | 0.472 ± 0.126     | 0.024         |               |       |
|                       |                     |                     | Cet 0.05          | 3.137 ± 0.763 | 0.175 ± 0.0418    | 0.021         |               |       |
|                       |                     | EGF 5 +<br>Cet 0.1  | EGF 5 +<br>Cet 10 | 1.991 ± 0.530 | 0.472 ± 0.126     | 0.032         |               |       |
|                       |                     |                     | Cet 0.1           | 1.991 ± 0.530 | 0.149 ± 0.050     | 0.026         |               |       |
|                       |                     |                     | EGF 5 +<br>Cet 1  | 1.056 ± 0.317 | 0.149 ± 0.050     | 0.036         |               |       |
|                       |                     | EGF 5 +<br>Cet 10   | Cet 10            | 0.472 ± 0.126 | 0.118 ± 0.066     | 0.023         |               |       |
|                       |                     |                     | 15 min            | EGF 5         | EGF 5 +<br>Cet 1  | 2.808 ± 0.250 | 0.860 ± 0.492 | 0.009 |
|                       |                     |                     |                   |               | EGF 5 +<br>Cet 10 | 2.808 ± 0.250 | 0.376 ± 0.076 | 0.002 |
|                       | EGF 5 +<br>Cet 0.05 | EGF 5 +<br>Cet 1    |                   | 2.293 ± 0.407 | 0.860 ± 0.492     | 0.019         |               |       |
|                       |                     | EGF 5 +<br>Cet 10   |                   | 2.293 ± 0.407 | 0.376 ± 0.076     | 0.012         |               |       |

|             |        |                     |                   |               |               |       |
|-------------|--------|---------------------|-------------------|---------------|---------------|-------|
|             |        |                     | Cet 0.05          | 2.293 ± 0.407 | 0.154 ± 0.025 | 0.012 |
|             |        | EGF 5 +<br>Cet 0.1  | EGF 5 +<br>Cet 10 | 1.939 ± 0.607 | 0.376 ± 0.076 | 0.045 |
|             |        |                     | Cet 0.1           | 1.939 ± 0.607 | 0.128 ± 0.049 | 0.035 |
|             |        | EGF 5 +<br>Cet 10   | Cet 10            | 0.376 ± 0.076 | 0.163 ± 0.095 | 0.041 |
|             | 4 h    | EGF 5 +<br>Cet 0.05 | Cet 0.05          | 2.249 ± 0.801 | 0.311 ± 0.167 | 0.047 |
| <b>MAPK</b> | 3 min  | EGF 5 +<br>Cet 10   | Cet 10            | 1.113 ± 0.166 | 0.619 ± 0.184 | 0.026 |
|             | 15 min | EGF 5 +<br>Cet 0.05 | Cet 0.05          | 1.549 ± 0.377 | 0.727 ± 0.316 | 0.046 |
|             |        | EGF 5 +<br>Cet 0.1  | Cet 0.1           | 1.544 ± 0.215 | 0.491 ± 0.089 | 0.007 |
|             |        | EGF 5 +<br>Cet 1    | Cet 1             | 1.503 ± 0.448 | 0.315 ± 0.207 | 0.028 |
|             |        | EGF 5 +<br>Cet 10   | Cet 10            | 1.263 ± 0.186 | 0.372 ± 0.389 | 0.040 |
|             | 4 h    | EGF 5 +<br>Cet 0.1  | Cet 0.1           | 1.467 ± 0.435 | 0.274 ± 0.205 | 0.026 |
|             |        | EGF 5 +<br>Cet 1    | Cet 1             | 1.438 ± 0.257 | 0.223 ± 0.137 | 0.005 |
| <b>AKT</b>  | 1 min  | 0                   | Cet 10            | 0.881 ± 0.014 | 1.056 ± 0.067 | 0.040 |
|             | 3 min  | EGF 5 +<br>Cet 0.05 | Cet 0.05          | 1.361 ± 0.189 | 0.779 ± 0.088 | 0.019 |
|             | 15 min | EGF 5 +<br>Cet 0.05 | Cet 0.05          | 1.578 ± 0.453 | 0.549 ± 0.335 | 0.038 |
|             |        | EGF 5 +<br>Cet 0.1  | EGF 5 +<br>Cet 10 | 1.379 ± 0.185 | 0.913 ± 0.151 | 0.029 |
|             |        |                     | Cet 0.1           | 1.379 ± 0.185 | 0.502 ± 0.152 | 0.004 |
|             |        | EGF 5 +<br>Cet 1    | Cet 1             | 1.333 ± 0.333 | 0.516 ± 0.147 | 0.035 |

**Table S6**

Pairwise comparisons of the EGFR, MAPK and AKT activation between different treatments in Hs746T cells. Cells were treated with EGF and/or cetuximab. Welch t-test was used. Significant p-values of relevant comparisons are shown.

Abbreviations: EGF 5: 5 ng/ml EGF; Cet 1: 1 µg/ml cetuximab; Cet 50: 50 µg/ml cetuximab

| Activation of protein | Groups (X vs. Y) |       | Mean ± SD (X)     | Mean ± SD (Y) | p-value       |       |
|-----------------------|------------------|-------|-------------------|---------------|---------------|-------|
|                       | X                | Y     |                   |               |               |       |
| AKT                   | 3 min            | EGF 5 | EGF 5 +<br>Cet 1  | 1.169 ± 0.050 | 0.950 ± 0.088 | 0.030 |
|                       |                  |       | EGF 5 +<br>Cet 50 | 1.169 ± 0.050 | 0.971 ± 0.026 | 0.008 |
|                       | 4 h              | 0     | EGF 5             | 0.812 ± 0.059 | 1.113 ± 0.038 | 0.003 |
|                       |                  |       | Cet 1             | 0.812 ± 0.059 | 0.961 ± 0.051 | 0.031 |

**Table S7**

Statistical values of activation of the EGFR signaling components pAKT, pCREB, pFAK and pMAPK in the gastric cancer cell lines Hs746T and MKN1.

Cells were treated for 4h with EGF and/or cetuximab. Listed are all relevant and significant values.

The Welch t-test was used to compare values.

Abbreviations: EGF 30: 30 ng/ml EGF; Cet 1: 1 µg/ml cetuximab

| Activation of protein | Cell line | Groups (X vs. Y)  |                   | Mean ± SD (X) | Mean ± SD (Y) | p-value |
|-----------------------|-----------|-------------------|-------------------|---------------|---------------|---------|
|                       |           | X                 | Y                 |               |               |         |
| <b>AKT</b>            | Hs746T    | EGF 30 +<br>Cet 1 | Cet 1             | 0.881 ± 0.173 | 1.207 ± 0.136 | 0.043   |
|                       | MKN1      | -                 | EGF 30            | 0.973 ± 0.173 | 1.569 ± 0.068 | 0.017   |
|                       |           | EGF 30            | EGF 30 +<br>Cet 1 | 1.569 ± 0.068 | 0.997 ± 0.075 | 0.001   |
| <b>CREB</b>           | Hs746T    | -                 | EGF 30            | 1.225 ± 0.205 | 0.726 ± 0.092 | 0.036   |
|                       |           | -                 | EGF 30 +<br>Cet 1 | 1.225 ± 0.205 | 0.756 ± 0.198 | 0.046   |
|                       | MKN1      | -                 | Cet1              | 1.077 ± 0.188 | 0.453 ± 0.075 | 0.018   |
| <b>FAK</b>            | MKN1      | -                 | EGF 30            | 0.844 ± 0.175 | 1.218 ± 0.104 | 0.044   |
|                       |           | -                 | EGF 30 +<br>Cet 1 | 0.844 ± 0.175 | 1.257 ± 0.108 | 0.034   |
| <b>MAPK</b>           | Hs746T    | EGF 30            | EGF 30 +<br>Cet 1 | 1.131 ± 0.095 | 0.882 ± 0.041 | 0.030   |
|                       | MKN1      | -                 | EGF 30            | 0.938 ± 0.125 | 1.475 ± 0.120 | 0.006   |
|                       |           | -                 | Cet 1             | 0.938 ± 0.125 | 0.238 ± 0.206 | 0.012   |
