# Supplementary material for: Evaluation of epidermal growth factor receptor signaling effects in gastric cancer cell lines by detailed motility-focused phenotypic characterization linked with molecular analysis
Source: Springer Nature journal article supplement (doi:10.1186/s12885-017-3822-3), 2017-12-01
Supplement: MOESM2 [file 15304870]

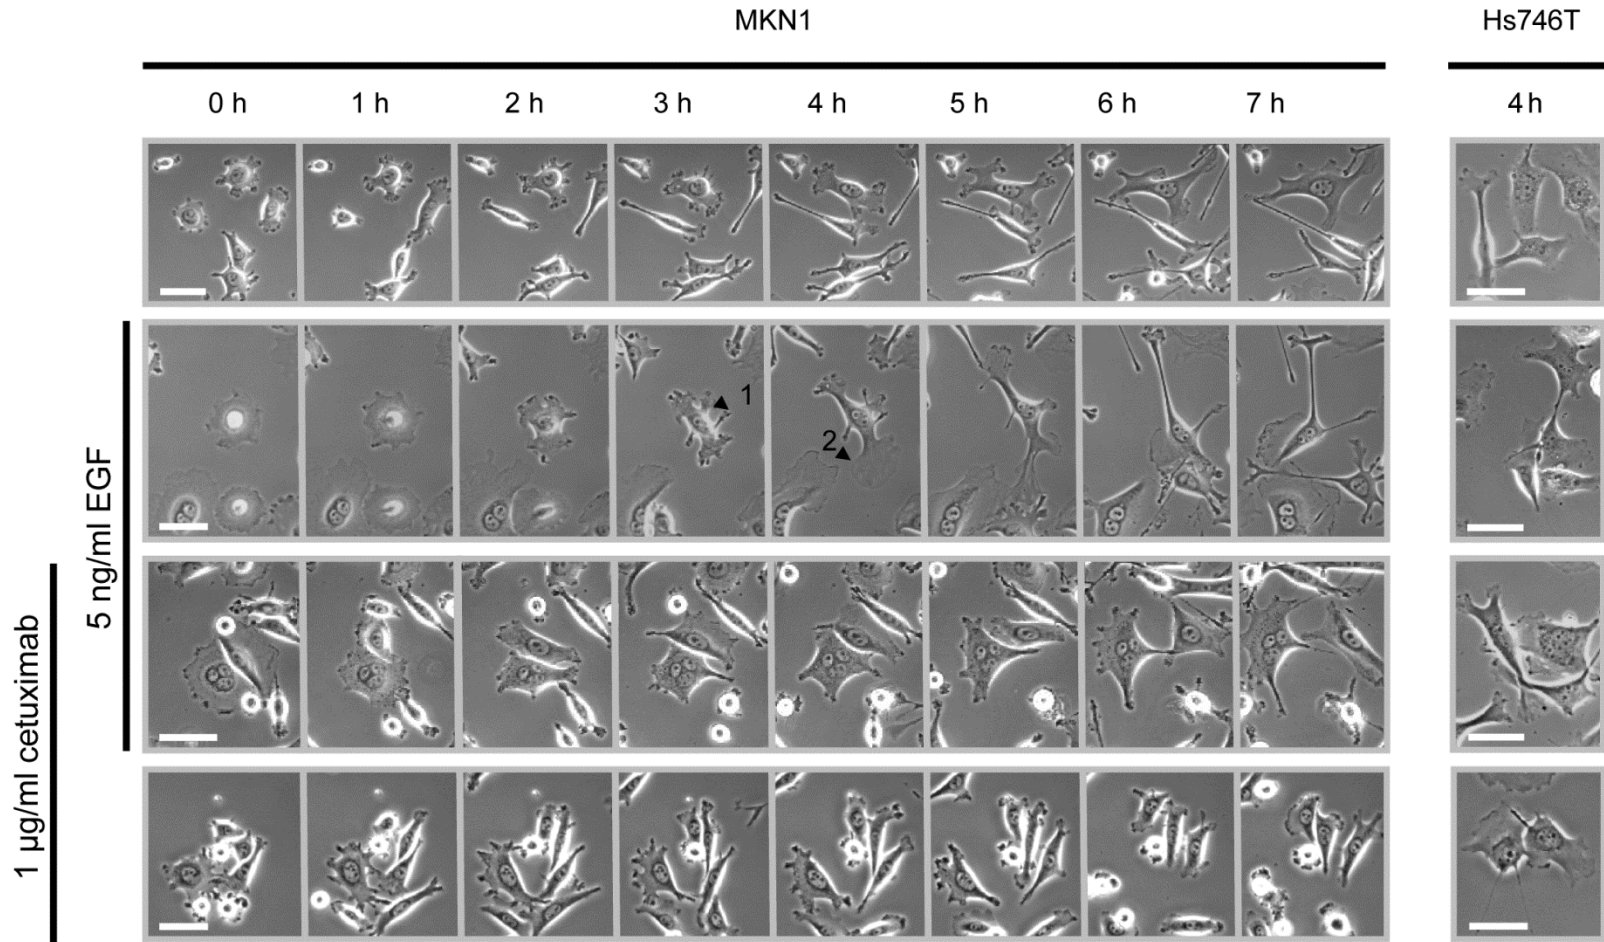

**Figure S1: Morphological differences in MKN1 cells after treatment with EGF and/or cetuximab during a 7 h film.** Denoted are hourly time-lapse microscopy film pictures of MKN1 cells with different treatments: untreated, EGF (5 ng/ml), EGF (5 ng/ml) + cetuximab (1 µg/ml) and cetuximab (1 µg/ml). Additionally, pictures of Hs746T cells after 4 h treatment are shown. The arrowheads indicate filopodia (1) and lamellipodia formation (2). Scale bar = 50 µm.
