# Supplementary material for: Evaluation of epidermal growth factor receptor signaling effects in gastric cancer cell lines by detailed motility-focused phenotypic characterization linked with molecular analysis
Source: Springer Nature journal article supplement (doi:10.1186/s12885-017-3822-3), 2017-12-01
Supplement: MOESM3 [file 15304870]

Figure S2

|   | 1 | 2            | 3                                | 4 | 5                                 | 6 | 7                                  | 8 | 9                  | 10 |
|---|---|--------------|----------------------------------|---|-----------------------------------|---|------------------------------------|---|--------------------|----|
| A |   | +            | p38α<br>T180/Y182                |   | ERK1/2<br>T202/Y204,<br>T185/Y187 |   | JNK pan<br>T183/Y185,<br>T221/Y223 |   | GSK-3α/β<br>S21/S9 |    |
| B |   |              | MEK1/2<br>S218/S222<br>S222/S226 |   | MSK1/2<br>S376/S360               |   | AMPKα1<br>T174                     |   | Akt1/2/3<br>S473   |    |
| C |   | TOR<br>S2448 | CREB<br>S133                     |   | HSP27<br>S78/S82                  |   | AMPKα2<br>T172                     |   | β-Catenin<br>-     |    |
| D |   | Src<br>Y419  | Lyn<br>Y397                      |   | Lck<br>Y394                       |   | STAT2<br>Y689                      |   | STAT5a<br>Y699     |    |
| E |   | Fyn<br>Y420  | Yes<br>Y426                      |   | Fgr<br>Y412                       |   | STAT3<br>Y705                      |   | STAT5b<br>Y699     |    |
| F |   | Hck<br>Y411  | Chk-2<br>T68                     |   | FAK<br>Y397                       |   | STAT6<br>Y641                      |   | STAT 5a/b<br>Y699  |    |
| G |   | +            |                                  |   | PBS                               |   |                                    |   |                    |    |

| 11                            | 12 | 13               | 14 | 15            | 16 | 17               | 18 |
|-------------------------------|----|------------------|----|---------------|----|------------------|----|
|                               |    | p53<br>S392      |    |               |    | +                |    |
| Akt1/2/3<br>T308              |    | p53<br>S46       |    |               |    |                  |    |
| p70 S6<br>Kinase<br>T389      |    | p53<br>S15       |    | p27<br>T198   |    | Paxillin<br>Y118 |    |
| p70 S6<br>Kinase<br>T421/S424 |    | RSK1/2/3<br>S380 |    | p27<br>T157   |    | PLCγ-1<br>Y783   |    |
| p70 S6<br>Kinase<br>T229      |    | RSK1/2<br>S221   |    | C-Jun<br>S63  |    | Pyk2<br>Y402     |    |
| STAT1<br>Y701                 |    | STAT4<br>Y693    |    | eNOS<br>s1177 |    | PBS              |    |
